1  
2  
3  
4  
5  
6  
7  
8  
9  
10  
11  
12  
13  
14  
15  
16  
17  
18  
19  
20  
21  
22  
23  
24  
25  
26  
27  
28  
29  
30

## The demyelinating agent cuprizone induces a male-specific reduction in binge eating in the binge-prone C57BL/6NJ strain

Richard K. Babbs<sup>1</sup>, Jacob A. Beierle<sup>1,2,3</sup>, Julia C. Kelliher<sup>1</sup>, Rose Medeiros<sup>1,4</sup>, Jeya Anandakumar<sup>1,4</sup>, Anyaa Shah<sup>1</sup>, Emily J. Yao<sup>1</sup>, Melanie M. Chen<sup>1</sup>, Camron D. Bryant<sup>1\*</sup>

### Affiliations

<sup>1</sup> Laboratory of Addiction Genetics, Department of Pharmacology and Experimental Therapeutics and Psychiatry, Boston University School of Medicine, 72 E. Concord St., L-606C, Boston, MA 02118 USA

<sup>2</sup> Biomolecular Pharmacology Ph.D. Program, Boston University School of Medicine

<sup>3</sup> Boston University's Transformative Training Program in Addiction Science (TTPAS), Biomedical Genetics, Boston University School of Medicine, 72 E. Concord St., E-200, Boston, MA 02118 USA

<sup>4</sup> National Institute on Drug Abuse Diversity Scholars Program, 6001 Executive Boulevard, Room 3105, MSC 9567, Bethesda, MD USA 20892-9567

### \*Corresponding Author

Camron D. Bryant, Ph.D.

Director, Laboratory of Addiction Genetics

Associate Professor

Department of Pharmacology and Experimental Therapeutics and Psychiatry

72 E. Concord St.

L-606C

Boston, MA 02118

E: [camron@bu.edu](mailto:camron@bu.edu)

P: (617) 638-4489

F: (617) 638-4329

31 **ABSTRACT**

32 Binge eating (**BE**) is a heritable symptom of eating disorders with an unknown genetic etiology.  
33 Rodent models for BE of palatable food permit the study of genetic and biological mechanisms.  
34 We previously used genetic mapping and transcriptome analysis to map a coding mutation in  
35 *Cyfp2* associated with increased BE in the BE-prone C57BL/6NJ substrain compared to the BE-  
36 resistant C57BL/6J substrain. The increase in BE in C57BL/6NJ mice was associated with a  
37 decrease in transcription of genes enriched for myelination in the striatum. Here, we tested the  
38 hypothesis that decreasing myelin levels with the demyelinating agent cuprizone would enhance  
39 BE. Mice were treated with a 0.3% cuprizone home cage diet for two weeks. Following a three-  
40 week recovery period, mice were trained for BE in an intermittent, limited access procedure.  
41 Cuprizone induced similar weight loss in both substrains and sexes that recovered within 48 h  
42 after removal of the cuprizone diet. Surprisingly, cuprizone reduced BE in male but not female  
43 C57BL/6NJ mice while having no effect in C57BL/6J mice. Cuprizone also reduced myelin basic  
44 protein (**MBP**) at seven weeks post-cuprizone removal while having no effect on myelin-  
45 associated glycoprotein (**MAG**) at this time point. C57BL/6N mice also showed less MBP than  
46 C57BL/6J mice. There were no statistical interactions of Treatment with Sex on MBP levels,  
47 indicating that differences in MBP are unlikely to account for sex differences in BE. To summarize,  
48 cuprizone induced an unexpected, male-specific reduction in BE which could indicate sex-specific  
49 biological mechanisms that depend on genetic background.

50

51 **KEY WORDS:** binge eating disorder, demyelination, sex differences, reduced complexity cross,  
52 QTL, sex as a biological variable

## 53 INTRODUCTION

54 Binge eating (**BE**) is operationally defined as the consumption of a relatively large amount  
55 of food over a short period of time, and is accompanied by feelings of loss of control (Amianto,  
56 Ottone, Abbate Daga, & Fassino, 2015). Repeated BE that occurs at least once per week for at  
57 least three months is termed binge eating disorder (**BED**). BE has a lifetime prevalence of  
58 approximately 4.5% (Hudson, Hiripi, Pope, & Kessler, 2007) and is associated with a number of  
59 comorbid behavioral, mood, and physical disorders such as substance abuse, depression,  
60 obesity, and chronic pain (Bulik & Reichborn-Kjennerud, 2003; Citrome, 2017; Hudson et al.,  
61 2007). Although there is no sex difference in the lifetime prevalence of BE, women are nearly  
62 twice as likely as men to progress to the more severe BED (3.5% vs. 2.0% respectively (Hudson  
63 et al., 2007). However, the etiology of this sex difference is not known.

64 Numerous neurophysiological and neuroanatomical changes have been identified in  
65 eating disorders (ED), including BED, bulimia nervosa (**BN**) and anorexia nervosa (**AN**), including  
66 alterations in both dopaminergic and serotonergic signaling in BN and AN (Frank et al., 2005;  
67 Kaye, 2008; Tauscher et al., 2001), reduced cerebral glucose metabolism in the anterior cingulate  
68 (Kojima et al., 2005; Naruo et al., 2001), and enhanced cerebral perfusion in the thalamus and  
69 amygdala-hippocampus complex in AN, and greater frontal cortical response to food stimuli in  
70 BED (Geliebter et al., 2006). Another important neuroanatomical change common to multiple  
71 types of ED involves changes in myelin which is the lipid-rich, membranous insulation sheath that  
72 extends from oligodendrocytes to the axons and is involved in axon maintenance (via  
73 oligodendrocyte signaling) and function, including rapid salutatory conduction of action potentials.  
74 BN is associated with a reduction in fractional anisotropy, a brain imaging measure of white matter  
75 integrity, in the corona radiata and corpus callosum (Mettler, Shott, Pryor, Yang, & Frank, 2013)  
76 as well as in forceps major and minor, inferior fronto-occipital, superior longitudinal, and uncinate  
77 fasciculi, corticospinal tract, and cingulum (He, Stefan, Terranova, Steinglass, & Marsh, 2016). In  
78 women with AN, a reduced fractional anisotropy relative to controls was reported in left superior

79 longitudinal fasciculus (Via et al., 2014). Importantly, previous results found no differences in white  
80 matter integrity between healthy controls and women who have recovered from AN (Yau et al.,  
81 2013), indicating that decreased myelination is a reversible consequence rather than a cause of  
82 aberrant eating behavior in ED. Additionally, both obese women and men show a decrease in  
83 myelination in obesity, but only in women did reduced myelin correlate with BMI and leptin levels  
84 (Mueller et al., 2011), suggesting potential sex differences in the contribution of demyelination to  
85 negative health consequences of eating disorders.

86 Using transcriptome analysis via mRNA sequencing (**RNA-seq**), we previously showed  
87 that BE of sweetened palatable food (**PF**) relative to chow controls induced a downregulation of  
88 several genes enriched for myelination, axon ensheathment, and oligodendrocyte formation and  
89 differentiation, providing evidence that, similar to BN and AN, decreased myelination is a  
90 consequence of BE in our preclinical model (Kirkpatrick et al., 2017). However, because  
91 transcriptome analysis is conducted at the mRNA level, it is not known whether the BE-induced  
92 decrease in myelin-associated transcripts translates to a decrease in myelin proteins.  
93 Furthermore, whether decreasing myelin levels could induce or enhance BE has not been tested.

94 In the present study, we tested the hypothesis that administration of the demyelinating  
95 agent cuprizone (a.k.a. cyclohexylidene hydrazide) in C57BL/6 mice (Hiremath et al., 1998) would  
96 induce BE in the BE-resistant C57BL/6J (**B6J**) substrain and enhance BE in the BE-prone  
97 C57BL/6NJ (**B6NJ**) substrain (Kirkpatrick et al., 2017). Laboratory chow containing 0.3%  
98 cuprizone has previously been shown to induce a significant decrease in myelination of the corpus  
99 callosum at 4 weeks and complete demyelination after six weeks (Hiremath et al., 1998) and two-  
100 week exposure of 0.2% cuprizone has been shown to be sufficient to induce nearly complete  
101 demyelination in mice (Doan et al., 2013). At the completion of the study, we harvested brain  
102 tissue and quantified two myelin proteins that are downregulated in the mouse brain following  
103 cuprizone treatment, including myelin-associated glycoprotein (**MAG**) and myelin basic protein  
104 (**MBP**) (Ludwin & Sternberger, 1984).

## 105      **METHODS**

### 106      **Mice**

107            All experiments were conducted in accordance with the NIH Guidelines for the Use of  
108      Laboratory Animals and were approved by the Institutional Animal Care and Use Committee at  
109      Boston University (AN-15403). Mice were maintained on a 12 h /12 h light/dark cycle (lights on at  
110      0630 h) and housed four animals per cage in same-sex cages. Laboratory chow (Teklad 18%  
111      Protein Diet, Envigo, Indianapolis, IN, USA) and tap water were available *ad libitum* in home  
112      cages prior to the experiment. Testing was conducted in the a.m. of the light phase (0800 h to  
113      1200 h) on a 12 h light/dark cycle (lights on at 0630 h). 32 C57BL/6J (**B6J**) and 32 C57BL/6NJ  
114      (**B6NJ**) mice (7 weeks old) were purchased from the Jackson Laboratory (JAX; Bar Harbor, ME).  
115      Mice were habituated to the vivarium for one week prior to cuprizone treatment in a room separate  
116      from the testing room. Mice were 56 days old at the beginning of cuprizone treatment and 91 days  
117      old on the first day of BE training.

118

### 119      **Cuprizone diet**

120            Sixty-four mice were assigned to a treatment group by cage (four mice per cage) in a 2 x  
121      2 factorial design so that N = 15-16 (8 females, 8 males) per Substrain (B6J, B6NJ) per Treatment  
122      (0.3% Cuprizone-treated Chow, Untreated Chow). Untreated Chow mice continued to have *ad*  
123      *libitum* access to water and standard laboratory chow described above throughout the entire  
124      study. On D1 of the study, the remaining 32 mice had the standard chow replaced with a chow  
125      that was structurally and nutritionally identical, but also contained 0.3% cuprizone (Envigo,  
126      Indianapolis, IN, USA), a copper chelating agent that induces demyelination in C57BL/6 mice by  
127      causing mitochondrial and endoplasmic reticulum stress and apoptosis in mature  
128      oligodendrocytes that in turn generates myelin debris and activation of astrocytes and microglia  
129      (Gudi, Gingele, Skripuletz, & Stangel, 2014; Hiremath et al., 1998; Sen, Mahns, Coorsen, &  
130      Shortland, 2019). Mice were maintained on this diet for two weeks, and on D14 the cuprizone diet

131 was replaced with standard laboratory chow as described above. Mice were allowed to recover  
132 for 21 days before BE training commenced. A nearly identical abbreviated, two-week cuprizone  
133 treatment protocol (0.2% rather than 0.3% cuprizone) was previously shown to be sufficient to  
134 induce robust demyelination in the corpus callosum at three weeks post-cuprizone treatment  
135 C57BL/6 (substrain not specified) mice (Doan et al., 2013). Specifically, the two-week 0.2%  
136 cuprizone regimen resulted in hallmark effects, including a marked depletion of mature  
137 oligodendrocytes and a significant accumulation of microglia and astrogliosis in the corpus  
138 callosum that peaked at the fifth week (3 weeks post-cuprizone termination) (Doan et al., 2013).  
139 The five week time point after 2 or 3 weeks of cuprizone diet is considered peak demyelination,  
140 after which remyelination begins and the levels of microglia and astrocytes decrease (Doan et al.,  
141 2013).

142

#### 143 **BE procedure**

144 Mice were trained in an intermittent, limited access procedure as described (R. K. Babbs  
145 et al., 2018; Richard K. Babbs et al., 2019; Kirkpatrick et al., 2017). We used a two-chambered  
146 conditioned place preference (**CPP**) apparatus, with differently textured floors in each chamber.  
147 The right and left sides were designated the food-paired and no-food-paired sides, respectively.  
148 Mice were trained and video recorded in unlit sound-attenuating chambers (MedAssociates, St.  
149 Albans, VT USA). On Day 1, initial side preference was determined by placing each mouse on  
150 the left, no-food-paired side with the divider containing an open entryway that provided free  
151 access to the both sides for 30 min. Clean, empty food bowls were placed in the far corners of  
152 each side. On Days 2, 4, 9, 11, 16, and 18, mice were confined to the food-paired side with a  
153 closed divider that prevented access to the no-food-paired side. Mice were provided forty, 20 mg  
154 sweetened palatable food pellets (**PF**; TestDiet 5-TUL, St. Louis, MO, USA) in a non-porous  
155 porcelain dish in the far corner of the chamber. On Days 3, 5, 10, 12, 17, and 19, mice were  
156 confined to the no-food-paired side with no access to the FP side. A clean, empty, and non-porous

157 porcelain dish was placed in the far corner of the chamber during this time. On Day 22, side  
158 preference was again assessed with open access to both sides. No food was present in either  
159 bowl at this time. The experimenter was blinded to Genotype throughout data collection, video  
160 tracking, and analysis. Video-recorded data were tracked using AnyMaze (Stoelting Co., Wood  
161 Dale, IL USA).

162

### 163 **Light/dark conflict test of compulsive-like eating**

164 Following BE training and assessment of PF-CPP, on Day 23, we subsequently assessed  
165 compulsive-like eating and concomitant behaviors in the anxiety-provoking light/dark conflict test  
166 (R. K. Babbs et al., 2018; Richard K. Babbs et al., 2019; Kirkpatrick et al., 2017) where rodents  
167 will normally avoid the aversive, light side. The light/dark box consists of a dark side, which is an  
168 enclosed black, opaque Plexiglas chamber, and a light side with clear Plexiglas. An open doorway  
169 allowed free access to both sides. A non-porous ceramic bowl containing forty, 20 mg PF pellets  
170 was placed in the center of the light side. Mice were initially placed on the light side facing both  
171 the food and the doorway and were video recorded for 30 min. Because the light side is aversive,  
172 increased behaviors in this environment were operationalized as compulsive-like, including  
173 compulsive-like eating.

174 On D24, brains were extracted and punches of the left and right striatum were harvested  
175 and combined as previously described (Kirkpatrick et al., 2017; Yazdani et al., 2015), flash frozen  
176 on acetone and dry ice, and stored at -80°C until western blotting procedures commenced. We  
177 chose to examine the striatum because this is the tissue in which we originally identified the  
178 downregulation of transcripts coding for genes associated with oligodendrocyte differentiation and  
179 myelination (Kirkpatrick et al., 2017). Cuprizone treatment has been shown to induce multiple  
180 signs of demyelination in the striatum, including the hallmark cuprizone effects of a decrease in  
181 MBP and other myelin proteins as well as an increase in astrogliosis (via GFAP) and microgliosis  
182 (via IBA1) in female C57BL/6N mice (Beckmann et al., 2018; Mandolesi et al., 2019)

183

## 184 **Immunoblotting for MAG and MBP**

185 Striatal tissue was homogenized in RIPA buffer (Thermo Scientific, Waltham, MA USA,  
186 #89901) containing 1x HALT protease/phosphatase inhibitor cocktail (Thermo Scientific,  
187 #1861284) with an ultrasonic homogenizer and then spun at 17200 RCF for 20 min at 4°C to  
188 collect supernatant. Protein concentration was quantified by BCA protein estimation (Thermo  
189 Scientific, #23225). 30 µg of sample protein and loading buffer (BioRad, Hercules, CA #161-0747)  
190 was loaded into 4-15% Criterion TGX gels (BioRad, #5671085) and run at 200 V for 50 min. Gels  
191 were transferred onto nitrocellulose membranes (General Electric, Boston, MA, USA, #10600002)  
192 for 1 h at 90 V in Towbins buffer containing 20% methanol. Blots were then blocked with 5% BSA  
193 in TBST (0.5% Tween 20 in tris-buffered saline) for 1 h.

194 For MAG detection, blots were incubated in a 1:5,000 dilution of anti-MAG antibody (EMD  
195 Millipore, Burlington, MA, USA, #MAB1567) in 5% BSA in TBST overnight at 4C, then a 1:10,000  
196 dilution of peroxidase conjugated donkey anti mouse antibody (Jackson Immunoresearch, West  
197 Grove, PA, USA, #715-035-151). For MBP detection, blots were incubated in a 1:10,000 dilution  
198 of anti-MBP antibody (EDM Millipore, #MAB 386) in 5% BSA in TBST overnight at 4C, then a  
199 1:10,000 dilution of peroxidase conjugated donkey anti rat antibody (Jackson Immunoresearch  
200 #712-035-153) for one hour. After probing, all blots were imaged using Clarity ECL (BioRad, #170-  
201 5061) and a c300 imager (Dublin, CA, USA).

202 Blots were then stripped (Thermo Scientific, 46430) at 55°C for 30 min, reblocked with 5%  
203 BSA in TBST, incubated in 1:50,000 Beta-actin antibody (Sigma Aldrich, St, Louis, MO, USA,  
204 #A2228) in 5% BSA in TBST for 1 h, and then a 1:10,000 dilution of peroxidase conjugated donkey  
205 anti mouse antibody for 1 h. Blots were then reimaged for beta actin. Densitometry was conducted  
206 using ImageJ, and each lane was normalized to its respective densitometry value for beta actin.  
207 Each lane was then normalized to the average wild-type value of that particular blot and then  
208 finally, data were combined across blots and statistical analysis was run in R as described below.



209

210

## 211 **Statistical analysis**

212 We analyzed food consumption in R (<https://www.r-project.org/>) using mixed model  
213 ANOVAs with Genotype, Sex, and Treatment as independent variables, and Day as a repeated  
214 measure. When the data were separated by Sex, mixed model ANOVAs were employed with  
215 Genotype and Treatment as independent variables, and Day as a repeated measure. Bonferroni-  
216 adjusted *post hoc* pairwise unpaired t-tests were used to determine whether group differences  
217 were significant on individual days. Slope analyses were conducted as previously described (R.  
218 K. Babbs, Wojnicki, & Corwin, 2012; Richard K. Babbs et al., 2019) using GraphPad Prism 7  
219 (GraphPad Software, La Jolla, CA USA).

220

## 221 **RESULTS**

### 222 **Cuprizone treatment induces weight loss in female and male B6J and B6NJ mice**

223 We employed a regimen consisting of one week of habituation to the colony, two weeks  
224 of the cuprizone diet, three weeks of recovery from cuprizone, and four weeks of training for BE  
225 of PF (**Fig.1**). A single cuprizone-assigned male B6J mouse died early on during the study.  
226 Therefore, the results are presented for 63 mice instead of 64 mice. In examining the sex-  
227 combined dataset, we found significantly lower body weight in cuprizone-treated mice of both the  
228 B6J and B6NJ strains on D8-D14 of cuprizone treatment (**Fig.2A**). Remarkably, within 24 h after  
229 the cuprizone diet was replaced with standard laboratory chow (D15), mice regained nearly all of  
230 their body weight and did not differ significantly from control mice (**Fig.2A**).

231 When considering the female and male datasets separately, females showed significant  
232 weight loss earlier on at D4 and D5 (**Fig.2B**) and both sexes showed a significant reduction in  
233 body weight from D8-D14, after which there was recovery of weight loss within 24 following  
234 removal of the cuprizone diet and replacement with normal home cage chow (**Fig.2B,C**).

235 **Cuprizone treatment reduces BE and compulsive-like eating in male but not female mice**  
236 **of the BE-prone B6NJ substrain**

237 Consistent with our previous report (Kirkpatrick et al., 2017), B6NJ mice showed greater  
238 overall PF consumption compared to B6J mice (**Fig.3**) - a behavior that we previously showed  
239 was associated with an enrichment of downregulated genes involved in myelination in the striatum  
240 (Kirkpatrick et al., 2017). However, contrary to our hypothesis that the demyelinating agent  
241 cuprizone would increase BE, prior treatment with cuprizone in the BE-prone B6NJ substrain  
242 actually decreased the amount of PF intake and decreased the slope of escalation in PF intake  
243 (**Fig.3A,B**). In contrast, there was no significant effect of cuprizone on the amount of PF intake in  
244 the BE-resistant B6J substrain, which, consistent with our previous findings (R. K. Babbs et al.,  
245 2018; Richard K. Babbs et al., 2019; Kirkpatrick et al., 2017), showed very little escalation of PF  
246 intake across days (**Fig.3A,B**). Despite the lack of effect of cuprizone on the amount of PF intake  
247 in B6J mice, cuprizone induced a small but significant non-zero slope in escalation of PF intake  
248 across days (**Fig.3B**). In examining compulsive-like PF intake in the light/dark conflict test on D23,  
249 as expected, the BE-prone B6NJ strain showed a significant increase in PF intake relative to the  
250 BE-resistant B6J strain; however, there was no effect of cuprizone or interaction with substrain in  
251 the sex-combined dataset (**Fig.3C**).

252 In examining females only, there was no significant effect of the cuprizone diet on PF  
253 consumption or compulsive-like PF intake (**Fig.3D,F**). However, there was a small but significant  
254 increase in the slope of escalation of PF intake in cuprizone-treated B6J females due to the uptick  
255 in PF intake on the final day of BE training (D18; **Fig.3D,E**). Furthermore, the escalation in  
256 cuprizone-treated B6J females was significantly greater than control B6J females ( $\#p = 0.045$ ;  
257 **Fig.3D**).

258 In examining males only, cuprizone-treated B6NJ mice showed a robust reduction in PF  
259 intake relative to their control B6NJ counterparts (**Fig.3G**). Additionally, cuprizone treatment  
260 eliminated the slope in escalation of PF intake (**Fig.3H**) and significantly reduced compulsive-like

261 PF intake in B6NJ males in the light/dark conflict test (**Fig.3I**). Thus, the cuprizone-induced  
262 reduction of PF intake in the sex-combined dataset was completely accounted for by male B6NJ  
263 mice.

264 In examining locomotor activity on D23 in the light side of the light/dark test for compulsive-  
265 like eating, there was a main effect of Genotype ( $F_{1,55} = 4.72$ ;  $p = 0.034$ ) and Sex ( $F_{1,55} = 3.97$ ;  
266  $p = 0.051$ ) but no effect of Treatment [ $F(1,55) = 0.03$ ;  $p = 0.86$ ] and no interactions ( $ps > 0.54$ )  
267 (data not shown). In examining time spent in the light-paired side, there was also no effect of  
268 Genotype [ $F(1,55) = 0.20$ ;  $p = 0.66$ ], Treatment [ $F(1,55) = 0.25$ ;  $p = 0.62$ ], or Sex [ $F(1,55) = 3.55$ ;  
269  $p = 0.065$ ] and no interactions ( $ps > 0.15$ ) (data not shown).

270

#### 271 **Effect of cuprizone on locomotor activity on D1 during initial preference assessment and** 272 **on D22 during PF-CPP assessment**

273 We did not observe any evidence for a potential confounding influence of cuprizone  
274 treatment on locomotor activity that could explain differences in PF intake. Specifically, in  
275 considering the sex-combined dataset for D1 locomotor activity during initial preference for the  
276 PF-paired side (5 weeks after the beginning of cuprizone treatment or i.e., three weeks after the  
277 termination of cuprizone treatment), there was no effect of Substrain or interaction with Treatment  
278 (**Fig.4A,C,E**). In considering the sex-combined dataset for D22 locomotor activity during  
279 assessment of PF-CPP, there was a significant Genotype x Treatment x Sex interaction that was  
280 explained by a small but significant decrease in locomotor activity in cuprizone-treated B6J  
281 females (**Fig.4B,D,F**) in the absence of any significant effect of PF intake (**see Fig.3D**).

282 In examining PF-CPP via the change in time spent on the PF-paired side between D1 and  
283 D22 (D22-D21; s), there was no effect of Genotype [ $F(1,55) = 0.01$ ;  $p = 0.91$ ], Treatment [ $F(1,55)$   
284  $= 0.47$ ;  $p = 0.50$ ], Sex [ $F(1,55) = 0.96$ ;  $p = 0.33$ ], or any interactions ( $ps > 0.41$ ). In an additional  
285 analysis of PF-CPP, we included Day as a repeated measure in a mixed effects ANOVA and in  
286 this case, we observed an overall effect of Day [ $F(1,55) = 6.74$ ;  $p = 0.012$ ] but no effect of

287 Genotype [ $F(1,55) = 0.056$ ;  $p = 0.82$ ], Treatment [ $F(1,55) = 0.64$ ;  $p = 0.43$ ], Sex [ $F(1,55) = 0.69$ ;  
288  $p = 0.41$ ], or any interactions ( $p$ s > 0.37) (data not shown).

289

### 290 **Effect of cuprizone on myelin proteins in the striatum**

291 We previously reported a BE-induced downregulation of a gene network enriched for  
292 myelination – an effect that was driven by the BE-prone B6NJ substrain (Kirkpatrick et al., 2017).  
293 Here, we examined differences in the myelin proteins MAG and MBP in B6NJ versus B6J mice  
294 and the effect of cuprizone on these protein levels. There were no effect of cuprizone treatment  
295 or substrain on MAG levels (**Fig.5A,B**). However, for MBP, cuprizone treatment induced a  
296 significant decrease in total MBP and in each of the MBP isoforms compared to control mice  
297 (**Fig.5A,D**). There was also a main effect of substrain on MBP, with B6NJ showing a decrease in  
298 the 14 kDa MBP protein isoform (**Fig.5D**). Despite the main effects of Treatment and Substrain,  
299 there were no main effects of Sex or interactions with Sex (statistics are reported in the figure  
300 legend of **Fig.5**).

301

### 302 **DISCUSSION**

303 The demyelinating agent cuprizone induced comparable weight loss in females and males  
304 of both the BE-resistant B6J substrain and the BE-prone B6NJ substrain (**Figs.1,2**), yet it induced  
305 robust substrain- and sex-dependent effects on PF intake. In contrast to our hypothesis that  
306 administration of the demyelinating agent cuprizone would enhance BE, we observed the  
307 opposite result - a robust reduction in BE in male but not female mice of the BE-prone B6NJ strain  
308 (**Fig.3**). The male-selective decrease in BE in cuprizone-treated B6NJ males could not be  
309 explained by confounding effects on locomotor activity (**Fig.4**) or by sex-interactive effects in the  
310 level of MAG or MBP (**Fig.5**) – two major myelin proteins.

311 Dose-dependent, reversible body weight loss during dietary cuprizone administration is  
312 well-documented (Hiremath et al., 1998; Skripuletz, Gudi, Hackstette, & Stangel, 2011; Steelman,

313 Thompson, & Li, 2012; Stidworthy, Genoud, Suter, Mantei, & Franklin, 2003). Severe weight loss  
314 contributes to the high mortality rates in cuprizone doses exceeding 0.3% (Hiremath et al., 1998;  
315 Stidworthy et al., 2003). The mechanism behind cuprizone-induced weight loss is unclear, but  
316 could involve copper chelation, given that copper deficiency in both rats (C. G. Taylor, Bettger, &  
317 Bray, 1988) and mice (Prohaska, 1983) results in reduced body weight. In the present study, we  
318 report a similar degree of weight loss in both female and male cuprizone-treated mice of both  
319 substrains (**Fig. 2**). Thus, it is unlikely that weight loss alone is responsible for the male-specific  
320 reduction in BE and compulsive-like eating in the BE-prone B6NJ substrain. Also, food restriction-  
321 induced weight loss promotes rather than reduces BE in rodents (Consoli, Contarino, Tabarin, &  
322 Drago, 2009; Pankevich, Teegarden, Hedin, Jensen, & Bale, 2010) and humans (Polivy, Zeitlin,  
323 Herman, & Beal, 1994), further suggesting that the reduction in PF consumption by cuprizone  
324 treatment is not likely caused by the weight loss that occurred three weeks prior to BE training.

325 In contrast to our original hypothesis, the demyelinating agent cuprizone produced very  
326 little effect in the BE-resistant B6J strain (although note the small but statistically significant  
327 increase in the slope of PF intake in cuprizone-treated B6J females versus their control B6J  
328 female counterparts; **Fig.3D**), nor did it enhance BE in the BE-prone strain (Kirkpatrick et al.,  
329 2017). Instead, cuprizone reduced BE in the BE-prone B6NJ strain and it did so only in male mice  
330 (**Fig.3**). This are several potential explanations underlying the substrain- and sex-dependent  
331 effect. Perhaps males are more sensitive to the ingestive and/or post-ingestive aversive  
332 properties of the cuprizone diet (e.g., taste, nausea) and show a learned, generalization effect on  
333 PF intake during BE. However, this explanation cannot account for the similar rate of body weight  
334 recovery in females and males following replacement of the home cage cuprizone diet with home  
335 cage chow (**Fig.2B,C**). Another possibility is that cuprizone induced a selective change in the  
336 perception or the hedonics of sweet taste in males. Indeed, only the cuprizone-treated B6NJ  
337 males initially consumed less PF than their control B6NJ male counterparts on the very first PF  
338 training day [ $t(14) = 2.47$ ;  $p = 0.027$ ; **Fig.3G**]. However, despite this initial reduction in PF intake,

339 the cuprizone-treated B6NJ males showed a sharp escalation in PF intake from the first to the  
340 second training day, after which they plateaued rather than continuing to escalate like their control  
341 B6NJ male counterparts (**Fig.3G,H**). It is also possible that cuprizone induced an anhedonic-like  
342 state selectively in B6NJ males that caused a reduction in PF intake (Sen et al., 2019) or, e.g.,  
343 novelty-induced hypophagia due to a depressive-like effect (Dulawa & Hen, 2005).

344 Here, we showed that two weeks of exposure to the cuprizone diet induced a significant  
345 reduction in the level of MBP when assessed at nearly nine weeks after the beginning of cuprizone  
346 without affecting MAG at the time of assessment, irrespective of Sex or Substrain (**Fig.5**). MBP  
347 is a major structural protein produced by oligodendrocytes and Schwann cells and redistributes to  
348 the processes to initiate axon ensheathment, compaction, thickening, and adhesion (Han,  
349 Myllykoski, Ruskamo, Wang, & Kursula, 2013; Harauz, Ladizhansky, & Boggs, 2009). Alternative  
350 splicing of MBP produces four major products coded by a single gene with alternative start sites  
351 for the larger and smaller isoforms, including the full length 21.5 kDa protein as well as the major  
352 18.5 kDa isoform and the 17 and 14 Kd isoforms (de Ferra et al., 1985; Harauz et al., 2009). MAG  
353 is a 100 kDa transmembrane glycoprotein of the inner layer of the myelin sheath that is expressed  
354 in oligodendrocytes and Schwann cells and contributes to the formation and maintenance of the  
355 myelin sheath as well as inhibitory signaling cascades during neuronal regeneration (Han et al.,  
356 2013). Previous studies have found a decrease in both proteins following cuprizone treatment  
357 followed by a recovery of MAG and MBP levels during remyelination (Ludwin & Sternberger,  
358 1984). It is unclear why we did not observe a change in MAG levels but perhaps the abbreviated  
359 protocol in our study was insufficient to change MAG levels. In support, a previous study of MBP  
360 and MAG in a viral model of recurring demyelinating lesions found a preferential decrease in MBP  
361 (Dal Canto & Barbano, 1985). Alternatively, our cuprizone regimen could have induced a  
362 reduction in MAG early on that recovered by the time of assessment at nearly nine weeks  
363 following the beginning of cuprizone treatment as the process of remyelination ensued (Ludwin &  
364 Sternberger, 1984). It is also possible that there are brain region-specific changes in myelin-

365 associated proteins and that the striatum shows a different profile than, e.g., the corpus callosum  
366 which is the hallmark tissue that is typically employed to assess the degree of cuprizone-induced  
367 demyelination.

368 We observed a decrease in MBP in the BE-prone B6NJ substrain versus BE-resistant B6J  
369 substrain that was significant for the 14 kDa isoform (**Fig.5**) and was consistent with our previous  
370 observation of an association of BE with the downregulated expression of a set of genes enriched  
371 for myelination (Kirkpatrick et al., 2017). In that study, the enrichment was identified as a function  
372 of Treatment (PF vs. Chow) and not as a function of Genotype (+/+ versus +/-) at the cytoplasmic  
373 FMR1-interacting protein 2 (*Cytip2*) gene - the likely major causal genetic factor explaining B6  
374 substrain differences in BE (Kirkpatrick et al., 2017; Kumar et al., 2013). However, a limitation of  
375 the current study is that because all mice received PF for BE training, we cannot state whether  
376 the decrease in MBP at the protein level in the B6NJ substrain versus the B6J substrain is simply  
377 a function of Genotype (Substrain) or if it also depends on training in BE with PF. Accumulating  
378 studies suggest a potential role of CYFIP proteins in myelination/demyelination. CYFIP2 facilitates  
379 the adhesion of T cells in CD4+ cells from patients with multiple sclerosis – a disease with the  
380 hallmark feature of demyelination (Mayne et al., 2004). A recent study employing overexpression  
381 of *Cytip1* (gene homolog of *Cytip2*) in mice resulted in changes in gene expression enriched for  
382 myelination (Fricano-Kugler et al., 2019). Furthermore, a second recent study found that *Cytip1*  
383 haploinsufficiency disrupted white matter, myelin sheath (axon diameter), and the intracellular  
384 distribution of MBP from the cell body to the processes of mature oligodendrocytes without  
385 changing axon number or diameter (Silva et al., 2019). We recently reported that *Cytip1*  
386 haploinsufficiency disrupts BE in a complex manner that depends on the *Cytip2* genotype  
387 inherited from the particular B6 substrain as well as sex, and parent-of-origin (Richard K. Babbs  
388 et al., 2019). Future immunoblotting and immunohistochemical analyses will be necessary to  
389 determine if there are pre-existing differences in myelin proteins between naïve B6 substrains



390 and if so, whether these differences are caused by the native *Cyfp2* coding mutation in the B6NJ  
391 substrain (Kirkpatrick et al., 2017; Kumar et al., 2013).

392 An additional factor that could contribute to sex differences in the effect of cuprizone on  
393 BE is weight loss-induced rebound hyperphagia. We are unaware of any studies demonstrating  
394 sex differences in eating behavior after weight loss in rodents – with or without cuprizone.  
395 However, greater hyperphagia has been reported in females compared to males after  
396 hypothalamic lesions in rats (Valenstein, Cox, & Kakolewski, 1969) and *118* deletion in mice  
397 (Zorrilla et al., 2007). Moreover, when rats were acutely fasted (12 hours), males showed a  
398 modest increase in food consumption in the 24 h post-fast, while females showed a robust  
399 increase in consumption that was significantly greater than that of the males (Gayle, Desai,  
400 Casillas, Beloosesky, & Ross, 2006). In a closer examination of our data, although both females  
401 and males treated with cuprizone showed similar reductions in body weight and similar regaining  
402 of body weight to pre-cuprizone levels (**Fig.2**), B6NJ females showed a faster percent body weight  
403 increase compared to B6NJ males during the first 24 h after the cuprizone diet was replaced with  
404 the normal chow diet [KEITH:  $t(df) = 2.5$ ;  $p = 0.02$ ; data not shown], providing some evidence for  
405 slower rebound hyperphagia in B6NJ males that could extend to less acute and escalated PF  
406 intake in the 30 min training trials.

407 Another potential factor explaining the male-specific reduction in BE with cuprizone could  
408 involve sex differences in the demyelinating effects of cuprizone and/or the process of  
409 remyelination. Previous reports have found no significant sex difference in cuprizone-induced  
410 demyelination in C57BL/6J mice (L. C. Taylor, Gilmore, Ting, & Matsushima, 2010). However, a  
411 separate study in the SJL inbred mouse strain showed less severe cuprizone-induced  
412 demyelination and loss of oligodendrocytes in female SJL and Swiss Webster mice (Ludwin,  
413 1978; L. C. Taylor, Gilmore, & Matsushima, 2009) which is consistent with the lack of significant  
414 behavioral effects observed with B6NJ females in the current study. Given that we used a different  
415 cuprizone regimen and importantly, given that we observed a sex difference in cuprizone



416 behavioral effects in a different genetic B6 substrain (B6NJ), it is possible that B6NJ female mice  
417 are less sensitive to cuprizone-induced demyelination which in turn could explain the lack of  
418 behavioral effect. However, our current immunoblotting results with MAG and MBP fail to support  
419 this hypothesis as we did not identify any significant Sex effects or Sex-interactive effects at nearly  
420 nine weeks after the beginning of cuprizone treatment. Assessment of myelin proteins via  
421 immunoblot and immunohistochemical procedures at multiple earlier time points (e.g., starting at  
422 five weeks) (Doan et al., 2013) and in multiple brain regions could address whether the enhanced  
423 behavioral effects of cuprizone in B6NJ males are supported by enhanced or earlier  
424 demyelination.

425 To summarize, we observed a male-specific reduction in BE in the BE-prone B6NJ  
426 substrain in response to the demyelinating agent cuprizone. These results suggest that sex-  
427 specific neurobiological mechanisms could underlie BE in a manner that depends on genetic  
428 background. Future studies employing additional and more selective demyelination/remyelination  
429 strategies in a spatiotemporal manner on multiple genetic backgrounds are necessary to test the  
430 contribution of sex differences in myelin dynamics in the establishment of and recovery from BE.

431

## 432 **ACKNOWLEDGEMENTS**

433 We thank Dr. Carmela R. Abraham for a discussion regarding the use of the cuprizone model in  
434 mice. This study was supported by R21DA038738, Spivack Award (Boston University), NIDA  
435 Summer Diversity Fellowship Program, and Boston University's Transformative Training Program  
436 in Addiction Science (Burroughs-Wellcome #1011479).

437

## 438 **AUTHOR CONTRIBUTIONS**

439 R.K.B. helped design the study and write the manuscript as well as treated the mice with  
440 cuprizone and analyzed behavior. J.A.B. oversaw and ran the immunoblots and conducted the  
441 immunoblot analysis and analyzed behavior. J.C.K. ran the behavioral study and contributed to

442 the analysis. R.M., J.A., and A.S. ran immunoblots and contributed to the analysis. E.J.Y.  
443 performed protein extractions and protein quantification. M.M.C. conducted video tracking and  
444 behavioral analysis. C.D.B. designed and oversaw the study and wrote the manuscript.

445 **FIGURE LEGENDS**

446 **Figure 1. Study protocol and timeline.** Mice were habituated for one week after their arrival.  
447 Mice then received either *ad libitum* standard laboratory chow or *ad libitum* cuprizone-treated lab  
448 diet for two weeks. After removal of cuprizone treatment, all mice were given *ad libitum* standard  
449 laboratory chow for three weeks. Finally, in weeks 7-10, training for binge eating (**BE**) commenced  
450 with continued *ad libitum* access to normal chow minus the 30 min training sessions with palatable  
451 food (**PF**). Mice were tested for side preference in the CPP chamber before and after training (D1  
452 and D22) for BE of PF. On D2, 4, 9, 11, 16, and 18, mice were confined to the right side of the  
453 chamber with access to PF. On D3, 5, 10, 12, 17, and 19, mice were confined to the left side of  
454 the chamber with an empty food bowl. On D23, the light/dark conflict test was conducted for  
455 compulsive-like PF consumption. On D24, brains were harvested, flash frozen, and stored at -  
456 80°C.

457  
458 **Figure 2. Changes in body weight over the course of cuprizone treatment and the week**  
459 **following termination of cuprizone treatment. A)** In examining change in body weight, mixed  
460 model ANOVA with Substrain, Sex, and Treatment as factors and Day as a repeated measure  
461 indicated no significant effect of Substrain [ $F(1,55) = 1.68$ ;  $p = 0.20$ ]. However, there was an effect  
462 of Treatment [ $F(1,55) = 54.04$ ;  $p = 1.0 \times 10^{-9}$ ], Sex [ $F(1,55) = 245.41$ ;  $p < 10^{-16}$ ] and a Substrain  
463 x Sex interaction [ $F(1,55) = 7.07$ ;  $p = 0.01$ ]. There was also a main effect of Day [ $F(15,825) =$   
464  $342.62$ ;  $p < 2 \times 10^{-16}$ ], a Substrain x Day interaction [ $F(15,825) = 2.02$ ;  $p = 0.012$ ], a Treatment x  
465 Day interaction [ $F(15,825) = 365.81$ ;  $p < 10^{-16}$ ], a Sex x Day interaction [ $F(15,825) = 3.21$ ;  $p =$   
466  $3.41 \times 10^{-5}$ ], a Substrain x Treatment x Day interaction [ $F(15,825) = 2.73$ ;  $p = 4.2 \times 10^{-4}$ ], and a  
467 Treatment x Sex x Day interaction [ $F(15,825) = 7.24$ ;  $p = 3.85 \times 10^{-15}$ ]. Cuprizone treatment (D1-  
468 14) induced a decrease in body weight in both cuprizone-treated substrains relative to their  
469 respective control groups on D8-14 [unpaired t-tests: B6J cuprizone vs. B6J control:  $t(29) = 4.12,$   
470  $4.44, 4.41, 4.65, 5.10, 5.50$ ; \* $p = 2.8 \times 10^{-4}, 1.2 \times 10^{-4}, 1.3 \times 10^{-4}, 6.7 \times 10^{-5}, 1.9 \times 10^{-5}, 6.3 \times 10^{-6}$ ;

471  $\alpha_{\text{adjusted}} = 0.05/16 = 0.0031$ ; B6NJ cuprizone vs. B6NJ control:  $t(30) = 4.52, 4.72, 5.10, 6.03, 5.95,$   
472  $5.55$ ;  $*p = 9.0 \times 10^{-5}, 5.1 \times 10^{-5}, 1.8 \times 10^{-5}, 1.6 \times 10^{-6}$ ;  $\alpha_{\text{adjusted}} = 0.0031$ ]. **B)** In females, there was  
473 an effect of Treatment [ $F(1,28) = 47.21$ ;  $p = 1.8 \times 10^{-7}$ ] but no effect of Substrain [ $F(1,28) = 1.99$ ;  
474  $p = 0.17$ ] and no interaction [ $F(1,28) = 1.85$ ;  $p = 0.19$ ]. Additionally, there was an effect of Day  
475 [ $F(15,420) = 226.0$ ;  $p < 2.0 \times 10^{-16}$ ], a nearly significant Substrain x Day interaction [ $F(15,420) =$   
476  $1.68$ ;  $p = 0.052$ ], and a Treatment x Day interaction [ $F(15,420) = 239.03$ ;  $p < 2 \times 10^{-16}$ ]. Cuprizone-  
477 treated B6J females weighed less than control B6J females on D4-D14 [ $t(14) = 5.34, 5.79, 9.20,$   
478  $9.23, 10.25, 12.08, 11.65, 12.42$ ,  $*p = 1.1 \times 10^{-4}, 4.7 \times 10^{-5}, 2.6 \times 10^{-7}, 2.5 \times 10^{-7}, 6.9 \times 10^{-8}, 8.6 \times$   
479  $10^{-9}, 1.4 \times 10^{-8}, 6.0 \times 10^{-9}$ , ;  $\alpha_{\text{adjusted}} = 0.0031$ ]. Similarly, cuprizone-treated B6NJ females also  
480 weighed less than control B6NJ females on D4-D14 [ $t(14) = 4.46, 5.17, 6.53, 11.23, 11.45, 10.90,$   
481  $10.64, 11.02$ ;  $*p = 5.4 \times 10^{-4}, 1.4 \times 10^{-4}, 1.3 \times 10^{-5}, 2.2 \times 10^{-8}, 1.7 \times 10^{-8}, 3.2 \times 10^{-8}, 4.3 \times 10^{-8}, 2.8$   
482  $\times 10^{-8}$ , ;  $\alpha_{\text{adjusted}} = 0.0031$ ]. **C)** In males, there was a main effect of Substrain [ $F(1,488) = 48.5$ ;  $p <$   
483  $1.0 \times 10^{-11}$ ], Treatment [ $F(1,488) = 170.3$ ;  $p < 2 \times 10^{-16}$ ], and Day [ $F(1,488) = 88.0$ ;  $p = 0.0002$ ] as  
484 well as a Substrain x Treatment interaction [ $F(1,488) = 12.4$ ;  $p = 0.0005$ ]. Cuprizone-treated B6J  
485 males weighed less than control B6J males on D8-D14 [ $t(13) = 5.29, 5.58, 5.41, 6.02, 6.63, 7.1$ ;  
486  $*p = 1.5 \times 10^{-4}, 9.0 \times 10^{-5}, 1.2 \times 10^{-4}, 4.3 \times 10^{-5}, 1.6 \times 10^{-5}, 8.1 \times 10^{-6}$ ;  $\alpha_{\text{adjusted}} = 0.0031$ ]. Similarly,  
487 cuprizone-treated B6NJ males also weighed less than control B6NJ males on D8-D14 [ $t(14) =$   
488  $6.55, 7.04, 7.60, 8.59, 7.48, 7.64$ ;  $*p = 1.3 \times 10^{-5}, 5.9 \times 10^{-6}, 2.5 \times 10^{-6}, 5.9 \times 10^{-7}, 3.0 \times 10^{-6}, 2.3 \times$   
489  $10^{-6}$ ;  $\alpha_{\text{adjusted}} = 0.0031$ ].

490

491 **Figure 3. Cuprizone treatment reduces BE in male but not female B6NJ mice. (A):** In  
492 examining the effect of cuprizone treatment on PF intake during BE training in the sex-combined  
493 dataset, a mixed effects ANOVA revealed a main effect of Substrain [ $F(1,55) = 50.16$ ;  $p = 2.76 \times$   
494  $10^{-9}$ ], Treatment [ $F(1,55) = 4.56$ ;  $p = 0.034$ ], a Substrain x Treatment interaction [ $F(1,55) = 4.78$ ;  
495  $p = 0.033$ ], and a nonsignificant effect of Sex [ $F(1,55) = 2.84$ ;  $p = 0.098$ ]. Additionally, there was  
496 an effect of Day [ $F(5,275) = 13.53$ ;  $p = 8.2 \times 10^{-12}$ ], a Substrain x Day interaction [ $F(5,275) = 4.83$ ;

497  $p = 3.0 \times 10^{-4}$ ], a Sex x Day interaction [ $F(5,275) = 2.89$ ;  $p = 0.015$ ], and a Substrain x Treatment  
498 x Day interaction [ $F(5,275) = 3.50$ ;  $p = 4.37 \times 10^{-4}$ ]. B6NJ control mice consumed more PF than  
499 both groups of B6J mice on all days (unpaired t-tests: #all  $p$ s  $< 0.003$ ;  $\alpha_{corrected} = 0.0083$ ).  
500 Cuprizone-treated B6NJ mice consumed less PF than their control B6NJ counterparts on D16  
501 and D18 [ $t(30) = 3.20, 3.49$ ; \* $p = 0.0032, 0.0015$ , respectively;  $\alpha_{adjusted} = 0.0083$ ]. **(B)**: In examining  
502 escalation in PF intake, both control B6NJ mice and cuprizone-treated B6J mice showed  
503 significant, non-zero slopes, indicating escalation [ $F(1,94) = 32.10$ , \$ $p < 0.0001$ ;  $F(1,88) = 7.15$ ;  
504 % $p < 0.01$ , respectively]. Furthermore, control B6NJ mice showed a significantly greater slope  
505 than cuprizone-treated B6NJ mice [ $F(1,188) = 6.07$ ; # $p = 0.015$ ] but there was no difference in  
506 slope between treatments in B6J mice [ $F(1,182) = 2.83$ ;  $p = 0.094$ ]. **(C)**: In examining compulsive-  
507 like PF intake in the light/dark conflict test, there was a main effect of Substrain [ $F(1,55) = 30.65$ ;  
508 # $p = 8.9 \times 10^{-7}$  (B6NJ mice showed greater PF intake than B6J mice)] and Sex [ $F(1,55) = 14.07$ ;  
509  $p = 4.3 \times 10^{-4}$ ], but no effect of Treatment [ $F(1,55) = 0.90$ ;  $p = 0.35$ ] and no interactions ( $p$ s  $>$   
510  $0.17$ ). **(D)**: In examining the effect of cuprizone treatment on PF intake during BE training in  
511 females, there was a main effect of Substrain [ $F(1,28) = 14.63$ ;  $p = 0.00067$ ], but no effect of  
512 Treatment [ $F(1,28) = 0.081$ ;  $p = 0.78$ ] and no Substrain x Treatment interaction [ $F(1,28) = 0.51$ ;  
513  $p = 0.48$ ]. There was also an effect of Day [ $F(5,140) = 8.93$ ;  $p = 2.2 \times 10^{-7}$ ] and a Substrain x Day  
514 interaction [ $F(5,140) = 2.50$ ;  $p = 0.033$ ]. Importantly, the lack of effect of Treatment or interaction  
515 with Substrain was confirmed by a lack of significant pairwise difference in PF intake between  
516 cuprizone-treated B6NJ females and control B6NJ females for any of the six training days [ $t(14)$   
517  $= 0.55, 0.38, 0.19, 0.32, 0.96, 0.97$ ;  $p = 0.59, 0.71, 0.85, 0.75, 0.35, 0.35$ , respectively;  $\alpha_{adjusted} =$   
518  $0.0083$ ]. Thus, the reduction in PF intake in cuprizone-treated B6NJ mice in panels A-C is not  
519 mediated by females. **(E)**: In examining escalation of PF intake in females, both the B6NJ control  
520 females and the cuprizone-treated B6J females showed a significant non-zero escalation [ $F(1,46)$   
521  $= 16.18$ , \* $p < 0.001$ ;  $F(1,46) = 8.59$ , % $p < 0.01$ , respectively] and although there was no difference  
522 in slope between the two treatments in B6NJ females [ $F(1,92) = 1.15$ ;  $p = 0.29$ ], cuprizone-treated

523 B6J females showed a significantly greater slope than control B6J females [ $F(1,92) = 4.14$ ;  $\#p =$   
524  $0.045$ ] that was driven by the uptick in PF intake on the final training day (D16) in cuprizone-  
525 treated B6J females (D16). **(F)**: In examining compulsive-like eating in the light/dark test in  
526 females, there was a main effect of Substrain [ $F(1,28) = 11.65$ ;  $\#p = 0.002$ ] but no effect of  
527 Treatment [ $F(1,28) = 0.049$ ;  $p = 0.83$ ] and no interaction [ $F(1,28) = 0.031$ ;  $p = 0.86$ ]. The effect of  
528 Substrain was explained by greater overall PF intake in B6NJ females versus B6J females (**#**).  
529 **(G)**: In examining the effect of cuprizone on PF intake during BE training in males, there was a  
530 main effect of Substrain [ $F(1,27) = 66.54$ ;  $p = 9.2 \times 10^{-9}$ ], Treatment [ $F(1,27) = 17.83$ ;  $p = 2.5 \times$   
531  $10^{-4}$ ], and a Substrain x Treatment interaction [ $F(1,27) = 11.10$ ;  $p = 0.0025$ ]. There was also an  
532 effect of Day [ $F(5,135) = 5.85$ ;  $p = 6.4 \times 10^{-5}$ ], a Substrain x Day interaction [ $F(5,135) = 4.29$ ;  $p =$   
533  $0.0012$ ], a Treatment x Day interaction [ $F(5,135) = 4.49$ ;  $p = 8.06 \times 10^{-4}$ ], and a Genotype x  
534 Treatment x Day interaction [ $F(5,135) = 2.99$ ;  $p = 0.014$ ]. Cuprizone-treated B6NJ males showed  
535 less PF intake than control B6NJ males on D16 and D18 [ $t(14) = 4.68, 6.31$ ;  $p = 3.6 \times 10^{-4}, 1.9 \times$   
536  $10^{-5}$ ;  $\alpha_{\text{adjusted}} = 0.0083$ ], thus accounting for the decreased PF intake in the sex-collapsed dataset  
537 in panels A and B. **(H)**: In examining the slopes in escalation, only the B6NJ control males showed  
538 a significant, non-zero escalation in PF consumption [ $F(1,46) = 22.83$ ;  $\$p < 0.0001$ ] and this slope  
539 was significantly greater than cuprizone-treated B6NJ males [ $F(1,92) = 10.23$ ;  $\#p = 0.0019$ ]. **(I)**:  
540 In examining compulsive-like PF intake in the light/dark test in males, there was a main effect of  
541 Substrain [ $F(1,27) = 35.81$ ;  $\#p = 2.2 \times 10^{-6}$  (B6NJ males showed greater PF intake than B6J  
542 males)], Treatment [ $F(1,27) = 8.31$ ;  $p = 0.0077$ ], and a Substrain x Treatment interaction [ $F(1,27)$   
543  $= 7.55$ ;  $p = 0.011$ ]. The interaction was explained by cuprizone-treated B6NJ males showing  
544 reduced compulsive-like PF intake compared to control B6NJ males [ $t(14) = 3.18$ ;  $*p = 0.0067$ ].

545

546 **Figure 4. Effect of cuprizone treatment on locomotor activity. (A,C,E)**: In examining  
547 locomotor activity on D1 over 30 min, there was an effect of Sex with females showing the  
548 expected greater locomotor activity than males [ $F(1,55) = 7.84$ ;  $p = 0.0071$ ] but no effect of

549 Genotype [ $F(1,55) = 1.29$ ;  $p = 0.26$ ], Treatment [ $F(1,55) = 3.08$ ;  $p = 0.085$ ], or any interactions ( $p$   
550  $> 0.086$ ). **(B,D,F)**: In examining locomotor activity on D22 over 30 min, there was no effect of  
551 Genotype [ $F(1,55) = 2.26$ ;  $p = 0.14$ ], Treatment [ $F(1,55) = 0.32$ ;  $p = 0.57$ ], or Sex [ $F(1,55) = 3.30$ ;  
552  $p = 0.075$ ]. However, there was a significant Genotype x Treatment x Sex interaction [ $F(1,55) =$   
553  $4.99$ ;  $p = 0.030$ ]. To determine the source of this three-way interaction on D22, we analyzed  
554 females and males separately. **(D)**: For D22 locomotor activity in females, there was a main effect  
555 of Genotype [ $F(1,28) = 6.86$ ;  $p = 0.014$ ], no effect of Treatment [ $F(1,28) = 0.38$ ;  $p = 0.55$ ], and a  
556 significant Genotype x Treatment interaction [ $F(1,28) = 6.94$ ;  $p = 0.014$ ]. The source of the  
557 interaction was explained by cuprizone-treated B6J females showing less locomotor activity on  
558 D22 than control B6J females [ $t(14) = 2.23$ ;  $p = 0.043$ ]. For males, there was no effect of Genotype  
559 [ $F(1,27) = 0.016$ ;  $p = 0.90$ ], Treatment [ $F(1,27) = 1.46$ ;  $p = 0.24$ ], or interaction [ $F(1,27) = 0.61$ ;  $p$   
560  $= 0.44$ ].

561

562 **Figure 5. Effect of Substrain and Treatment on MAG and MBP protein levels in the striatum.**

563 **(A)**: Representative immunoblots of striatal tissue from for MAG and MBP from cuprizone-treated  
564 (+) and untreated (-) C57BL/6J (**J**) and C57BL/6NJ (**N**) mice. **(B,C)**: For MAG protein, there was  
565 no effect of Cuprizone Treatment [ $F(1,54) = 0.47$ ;  $p = 0.49$ ], Substrain [ $F(1,54) = 2.28$ ;  $p = 0.14$ ],  
566 Sex [ $F(1,54) = 2.87$ ;  $p = 0.10$ ] or any interactions ( $ps > 0.34$ ). The lack of effect of Treatment and  
567 Substrain on MAG protein levels is shown graphically in panels B and C as a comparison with  
568 MBP (below). **(D)**: For total MBP protein, there as an effect of Treatment [ $F(1,54) = 20.96$ ;  $p = 2.8$   
569  $\times 10^{-5}$ ] and a nearly significant effect of Substrain [ $F(1,54) = 3.72$ ;  $p = 0.059$ ] but no effect of Sex  
570 [ $F(1,54) = 0.15$ ;  $p = 0.70$ ] and no interactions ( $ps > 0.14$ ). For the 21 kDa band, there was a main  
571 effect of Treatment [ $F(1,54) = 8.06$ ;  $p = 0.0064$ ] but no effect of Substrain [ $F(1,54) = 1.90$ ;  $p =$   
572  $0.17$ ], Sex [ $F(1,54) = 0.012$ ;  $p = 0.91$ ], or any interactions ( $ps > 0.10$ ). For the 18.5 + 17 kDa  
573 bands, there was a main effect of Treatment [ $F(1,54) = 17.42$ ;  $p = 0.00011$ ] and a nonsignificant  
574 effect of Substrain [ $F(1,54) = 3.29$ ;  $p = 0.075$ ] but no effect of Sex [ $F(1,54) = 0.078$ ;  $p = 0.78$ ] and

575 no interactions ( $p$ s > 0.15). For the 14 kDa band, there was an effect of Treatment [ $F(1,54) =$   
576 40.24;  $p = 4.8 \times 10^{-8}$ ] and Substrain [ $F(1,54) = 7.8$ ;  $p = 0.0072$ ] but no effect of Sex [ $F(1,54) =$   
577 0.98;  $p = 0.33$ ] and no interactions ( $p$ s > 0.11). **(D)**: To follow up on the Treatment effects, unpaired  
578 t-tests for the total, 21 kDa, 18/17 kDa, and 14 kDa MBP bands indicated a significant decrease  
579 in MBP for all bands [ $t(60) = 4.56, 2.87, 4.19, \text{ and } 6.00$ ;  $p = 2.6 \times 10^{-5}, 0.0057, 9.3 \times 10^{-5}, 1.2 \times 10^{-$   
580  $7$ , respectively]. **(E)**: To follow up on the trending Substrain effect, unpaired t-tests for the total, 21  
581 kDa, 18.5/17 kDa, and 14 kDa MBP bands indicated a significant decrease in the immunostaining  
582 of the 14 kDa band (\*) in the B6NJ strain (N) [ $t(60) = 1.82, 1.42, 1.76, \text{ and } 2.32$ ;  $p = 0.073, 0.16,$   
583 0.084, and \*0.024, respectively].

584



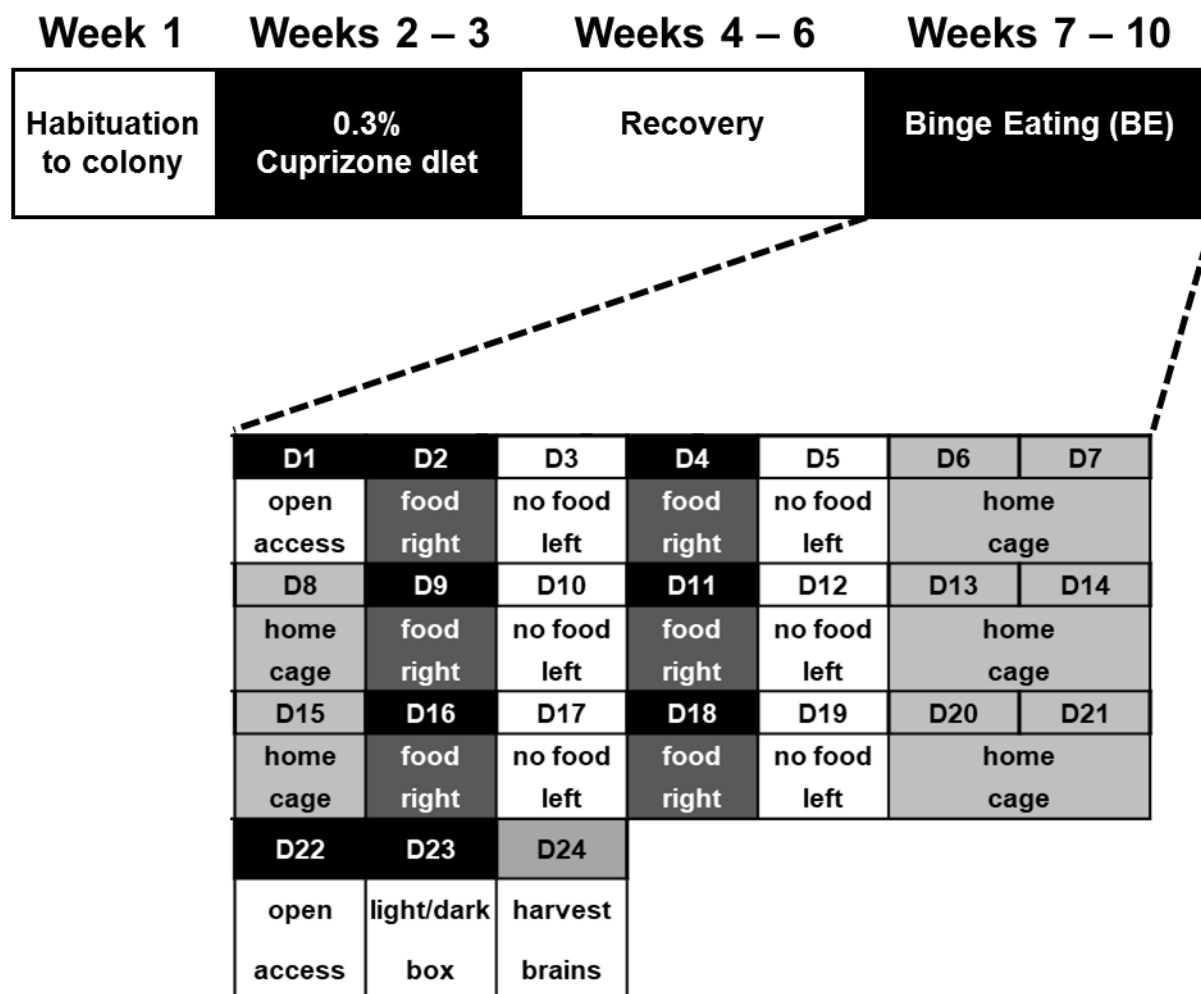

586

FIGURE 2

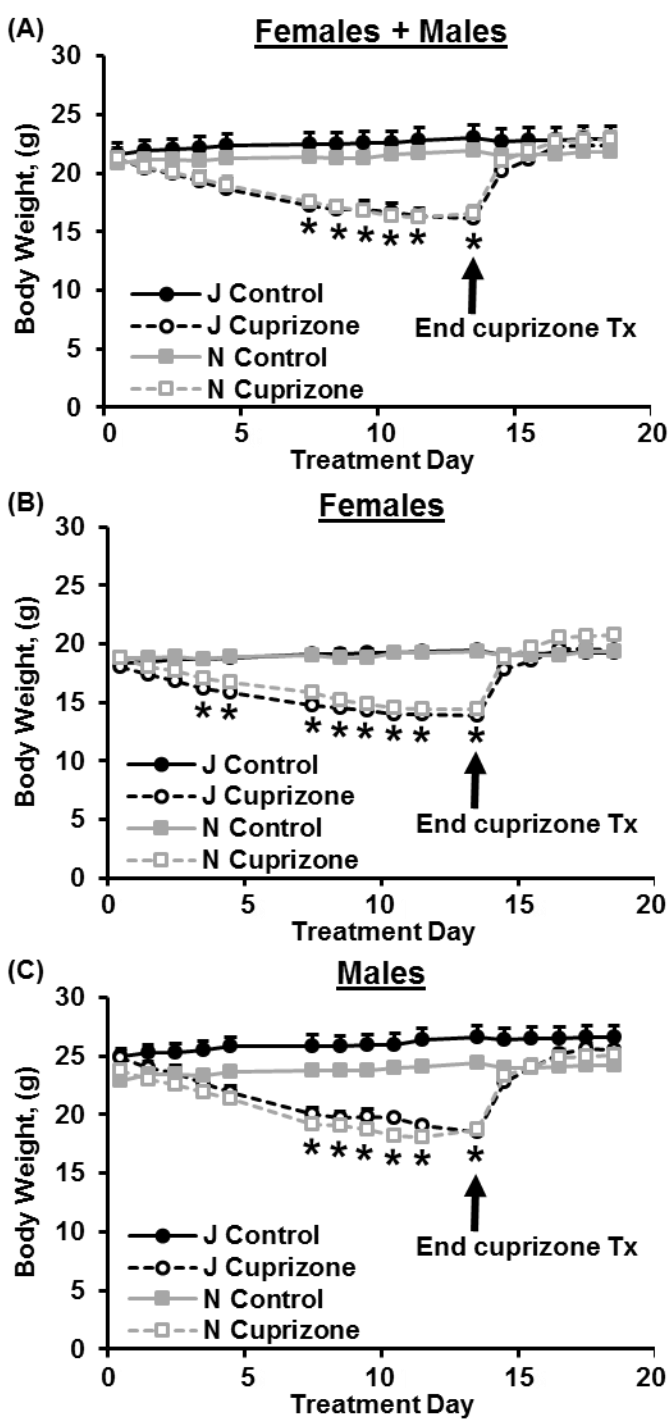

587

FIGURE 3

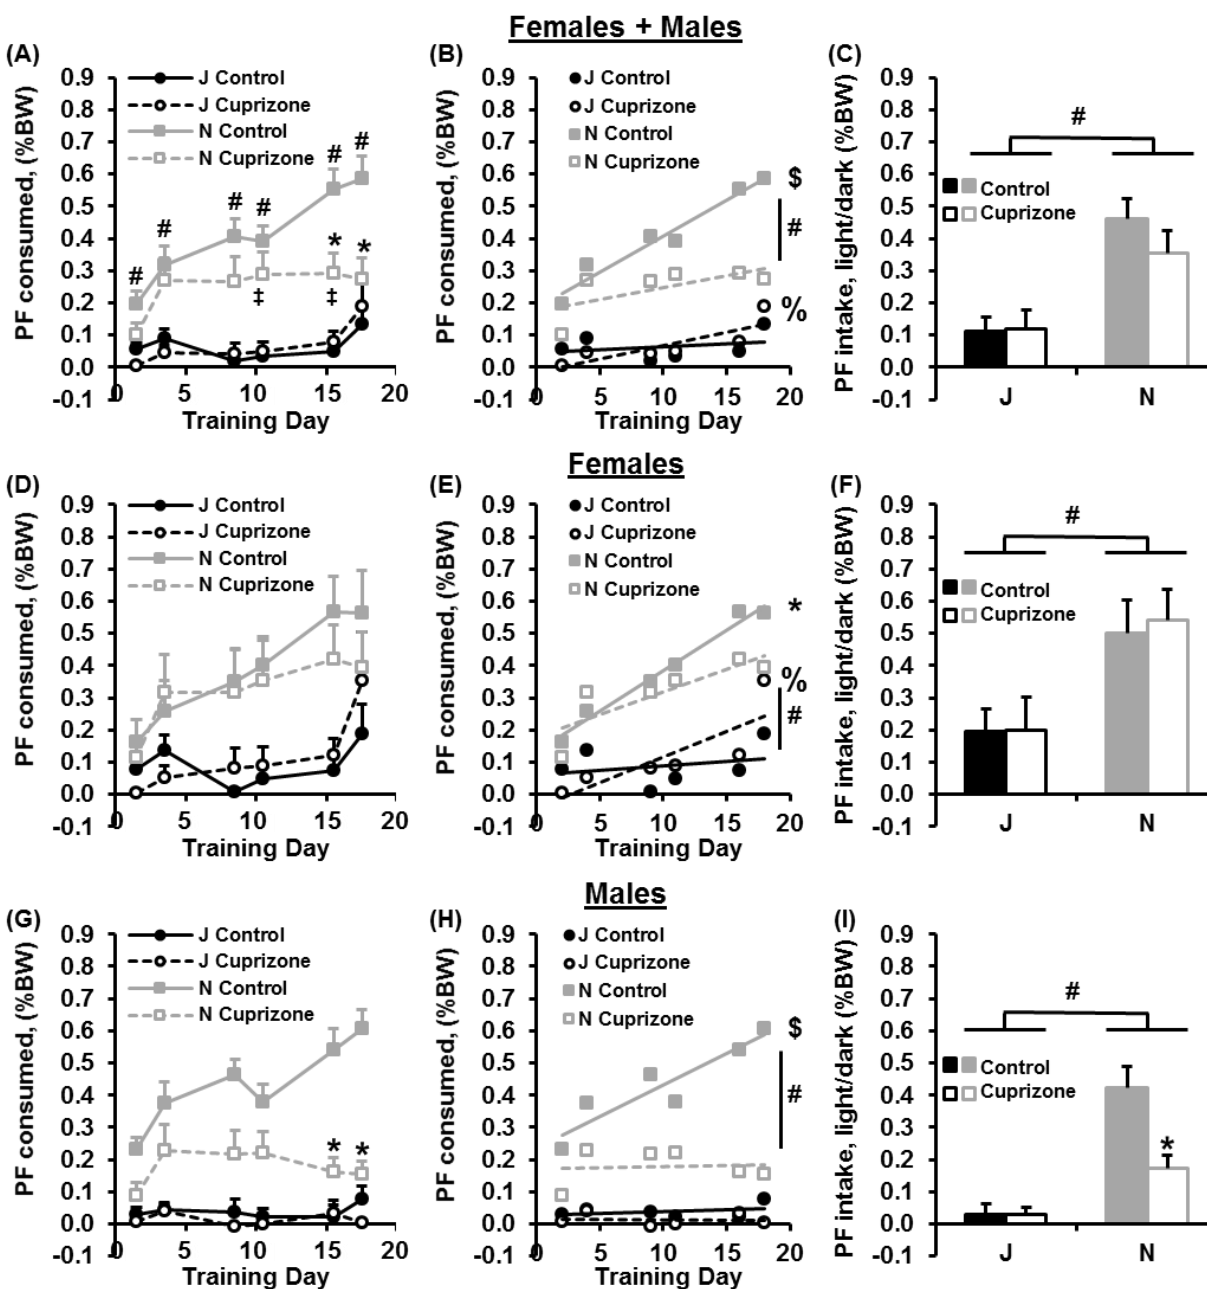

588

FIGURE 4

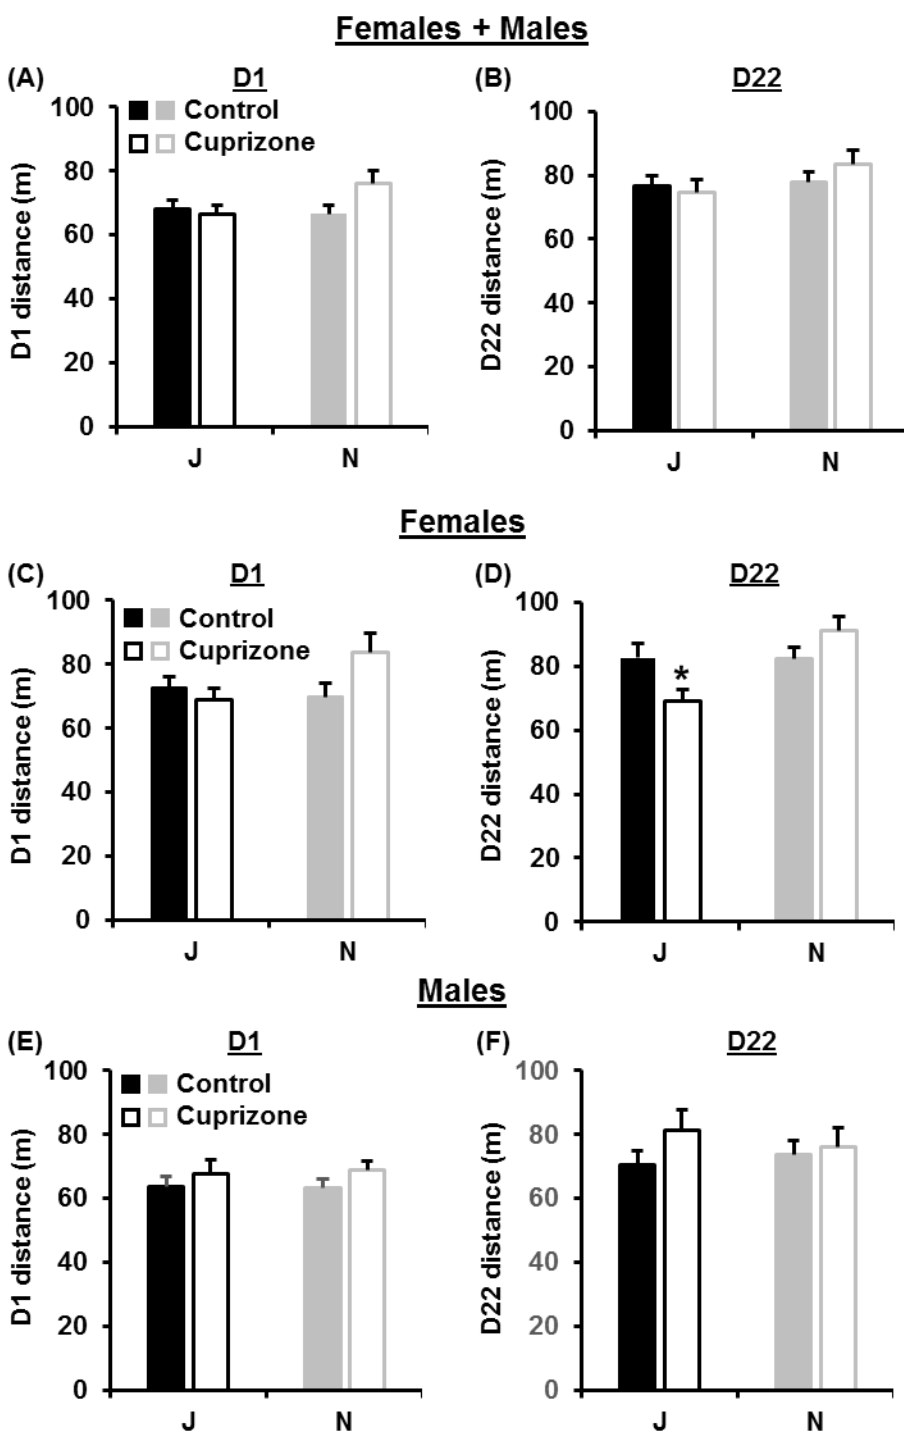

589

FIGURE 5

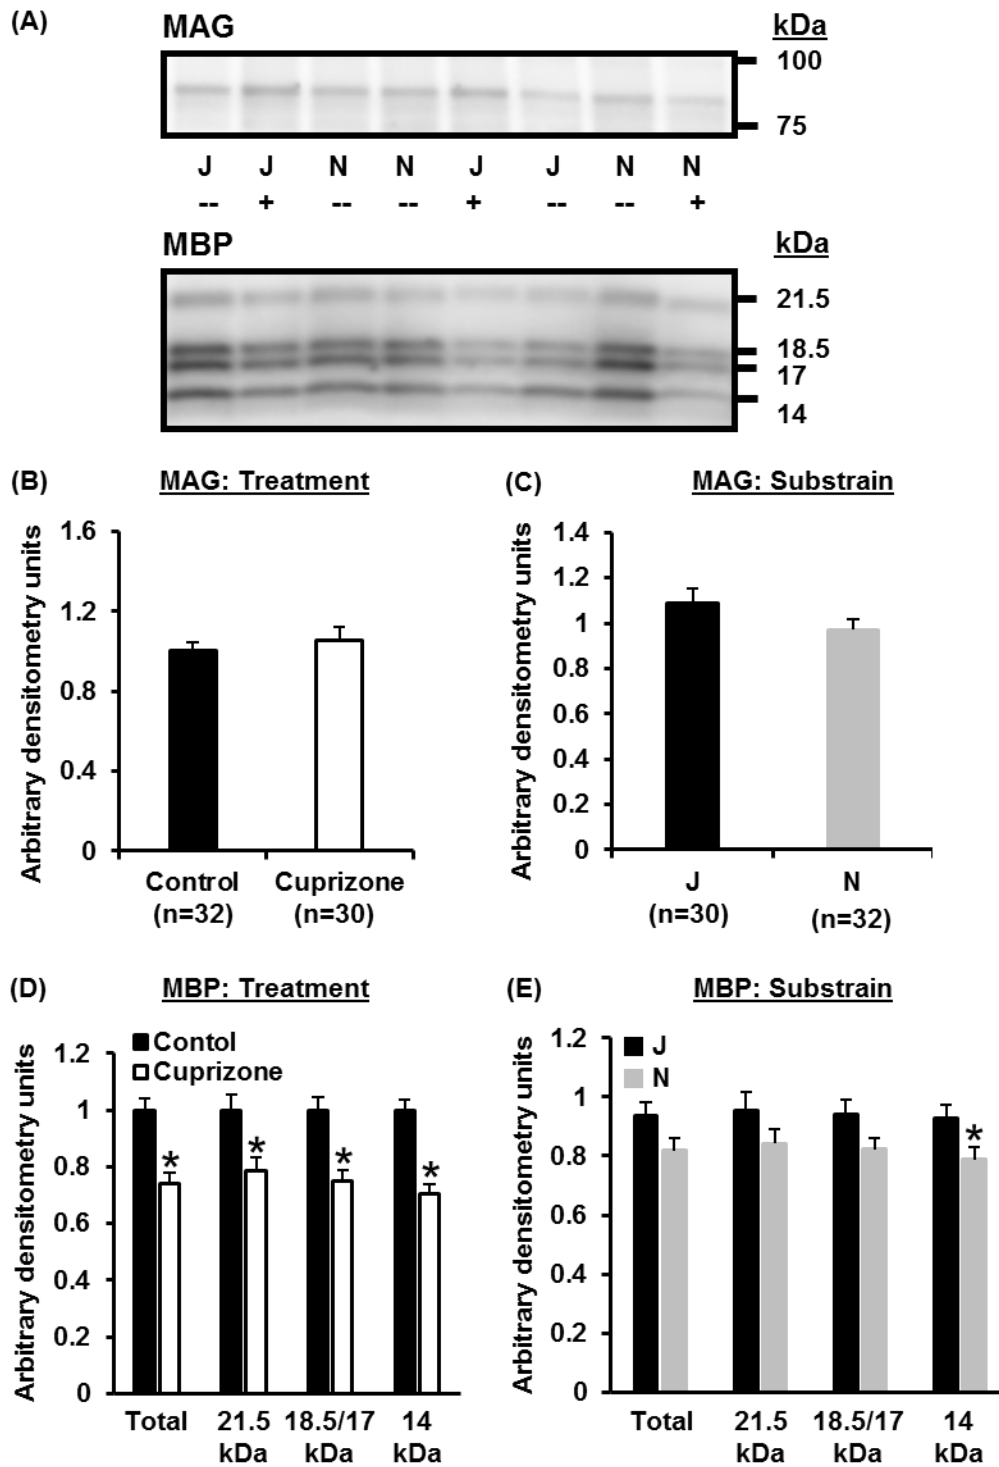

- 590 Amianto, F., Ottone, L., Abbate Daga, G., & Fassino, S. (2015). Binge-eating disorder diagnosis  
591 and treatment: a recap in front of DSM-5. *BMC Psychiatry*, 15(Journal Article), 70-015-  
592 0445–0446. <https://doi.org/10.1186/s12888-015-0445-6>
- 593 Babbs, R. K., Kelliher, J. C., Scotellaro, J. L., Luttik, K. P., Mulligan, M. K., & Bryant, C. D.  
594 (2018). Genetic differences in the behavioral organization of binge eating, conditioned  
595 food reward, and compulsive-like eating in C57BL/6J and DBA/2J strains. *Physiology &*  
596 *Behavior*, 197(Journal Article), 51–66.
- 597 Babbs, R. K., Wojnicki, F. H., & Corwin, R. L. (2012). Assessing binge eating. An analysis of  
598 data previously collected in bingeing rats. *Appetite*, 59(2), 478–482.  
599 <https://doi.org/10.1016/j.appet.2012.05.022>
- 600 Babbs, Richard K., Beierle, J. A., Ruan, Q. T., Kelliher, J. C., Chen, M. M., Feng, A. X., ...  
601 Bryant, C. D. (2019). Cyfip1 Haploinsufficiency Increases Compulsive-Like Behavior and  
602 Modulates Palatable Food Intake in Mice: Dependence on Cyfip2 Genetic Background,  
603 Parent-of Origin, and Sex. *G3 (Bethesda, Md.)*, 9(9), 3009–3022.  
604 <https://doi.org/10.1534/g3.119.400470>
- 605 Beckmann, N., Giorgetti, E., Neuhaus, A., Zurbrugg, S., Accart, N., Smith, P., ... Shimshek, D.  
606 R. (2018). Brain region-specific enhancement of remyelination and prevention of  
607 demyelination by the CSF1R kinase inhibitor BLZ945. *Acta Neuropathologica*  
608 *Communications*, 6(1), 9. <https://doi.org/10.1186/s40478-018-0510-8>
- 609 Bulik, C. M., & Reichborn-Kjennerud, T. (2003). Medical morbidity in binge eating disorder. *The*  
610 *International Journal of Eating Disorders*, 34 Suppl(Journal Article), S39-46.  
611 <https://doi.org/10.1002/eat.10204>
- 612 Citrome, L. (2017). Binge-Eating Disorder and Comorbid Conditions: Differential Diagnosis and  
613 Implications for Treatment. *The Journal of Clinical Psychiatry*, 78 Suppl 1(Journal  
614 Article), 9–13. <https://doi.org/10.4088/JCP.sh16003su1c.02>

- 615 Consoli, D., Contarino, A., Tabarin, A., & Drago, F. (2009). Binge-like eating in mice. *The*  
616 *International Journal of Eating Disorders*, 42(5), 402–408.  
617 <https://doi.org/10.1002/eat.20637>;
- 618 Dal Canto, M. C., & Barbano, R. L. (1985). Immunocytochemical localization of MAG, MBP and  
619 P0 protein in acute and relapsing demyelinating lesions of Theiler's virus infection.  
620 *Journal of Neuroimmunology*, 10(2), 129–140. [https://doi.org/10.1016/0165-](https://doi.org/10.1016/0165-5728(85)90003-7)  
621 [5728\(85\)90003-7](https://doi.org/10.1016/0165-5728(85)90003-7)
- 622 de Ferra, F., Engh, H., Hudson, L., Kamholz, J., Puckett, C., Molineaux, S., & Lazzarini, R. A.  
623 (1985). Alternative splicing accounts for the four forms of myelin basic protein. *Cell*, 43(3  
624 Pt 2), 721–727. [https://doi.org/10.1016/0092-8674\(85\)90245-4](https://doi.org/10.1016/0092-8674(85)90245-4)
- 625 Doan, V., Kleindienst, A. M., McMahon, E. J., Long, B. R., Matsushima, G. K., & Taylor, L. C.  
626 (2013). Abbreviated exposure to cuprizone is sufficient to induce demyelination and  
627 oligodendrocyte loss. *Journal of Neuroscience Research*, 91(3), 363–373.  
628 <https://doi.org/10.1002/jnr.23174>
- 629 Dulawa, S. C., & Hen, R. (2005). Recent advances in animal models of chronic antidepressant  
630 effects: the novelty-induced hypophagia test. *Neuroscience and Biobehavioral Reviews*,  
631 29(4–5), 771–783. <https://doi.org/10.1016/j.neubiorev.2005.03.017>
- 632 Frank, G. K., Bailer, U. F., Henry, S. E., Drevets, W., Meltzer, C. C., Price, J. C., ... Kaye, W. H.  
633 (2005). Increased dopamine D2/D3 receptor binding after recovery from anorexia  
634 nervosa measured by positron emission tomography and [11c]raclopride. *Biological*  
635 *Psychiatry*, 58(11), 908–912. <https://doi.org/10.1016/j.biopsych.2005.05.003>
- 636 Fricano-Kugler, C., Gordon, A., Shin, G., Gao, K., Nguyen, J., Berg, J., ... Geschwind, D. H.  
637 (2019). CYFIP1 overexpression increases fear response in mice but does not affect  
638 social or repetitive behavioral phenotypes. *Molecular Autism*, 10, 25.  
639 <https://doi.org/10.1186/s13229-019-0278-0>

- 640 Gayle, D. A., Desai, M., Casillas, E., Beloosesky, R., & Ross, M. G. (2006). Gender-specific  
641 orexigenic and anorexigenic mechanisms in rats. *Life Sciences*, 79(16), 1531–1536.  
642 <https://doi.org/10.1016/j.lfs.2006.04.015>
- 643 Geliebter, A., Ladell, T., Logan, M., Schneider, T., Schweider, T., Sharafi, M., & Hirsch, J.  
644 (2006). Responsivity to food stimuli in obese and lean binge eaters using functional MRI.  
645 *Appetite*, 46(1), 31–35. <https://doi.org/10.1016/j.appet.2005.09.002>
- 646 Gudi, V., Gingele, S., Skripuletz, T., & Stangel, M. (2014). Glial response during cuprizone-  
647 induced de- and remyelination in the CNS: lessons learned. *Frontiers in Cellular*  
648 *Neuroscience*, 8, 73. <https://doi.org/10.3389/fncel.2014.00073>
- 649 Han, H., Myllykoski, M., Ruskamo, S., Wang, C., & Kursula, P. (2013). Myelin-specific proteins:  
650 a structurally diverse group of membrane-interacting molecules. *BioFactors (Oxford,*  
651 *England)*, 39(3), 233–241. <https://doi.org/10.1002/biof.1076>
- 652 Harauz, G., Ladizhansky, V., & Boggs, J. M. (2009). Structural polymorphism and  
653 multifunctionality of myelin basic protein. *Biochemistry*, 48(34), 8094–8104.  
654 <https://doi.org/10.1021/bi901005f>
- 655 He, X., Stefan, M., Terranova, K., Steinglass, J., & Marsh, R. (2016). Altered White Matter  
656 Microstructure in Adolescents and Adults with Bulimia Nervosa.  
657 *Neuropsychopharmacology: Official Publication of the American College of*  
658 *Neuropsychopharmacology*, 41(7), 1841–1848. <https://doi.org/10.1038/npp.2015.354>
- 659 Hiremath, M. M., Saito, Y., Knapp, G. W., Ting, J. P., Suzuki, K., & Matsushima, G. K. (1998).  
660 Microglial/macrophage accumulation during cuprizone-induced demyelination in  
661 C57BL/6 mice. *Journal of Neuroimmunology*, 92(1–2), 38–49.  
662 [https://doi.org/10.1016/s0165-5728\(98\)00168-4](https://doi.org/10.1016/s0165-5728(98)00168-4)
- 663 Hudson, J. I., Hiripi, E., Pope, H. G., Jr, & Kessler, R. C. (2007). The prevalence and correlates  
664 of eating disorders in the National Comorbidity Survey Replication. *Biological Psychiatry*,  
665 61(3), 348–358. <https://doi.org/10.1016/j.biopsych.2006.03.040>



- 666 Kaye, W. (2008). Neurobiology of anorexia and bulimia nervosa. *Physiology & Behavior*, *94*(1),  
667 121–135. <https://doi.org/10.1016/j.physbeh.2007.11.037>
- 668 Kirkpatrick, S. L., Goldberg, L. R., Yazdani, N., Babbs, R. K., Wu, J., Reed, E. R., ... Bryant, C.  
669 D. (2017). Cytoplasmic FMR1-Interacting Protein 2 Is a Major Genetic Factor Underlying  
670 Binge Eating. *Biological Psychiatry*, *81*(9), 757–769.
- 671 Kojima, S., Nagai, N., Nakabeppu, Y., Muranaga, T., Deguchi, D., Nakajo, M., ... Naruo, T.  
672 (2005). Comparison of regional cerebral blood flow in patients with anorexia nervosa  
673 before and after weight gain. *Psychiatry Research*, *140*(3), 251–258.  
674 <https://doi.org/10.1016/j.psychresns.2005.08.002>
- 675 Kumar, V., Kim, K., Joseph, C., Kourrich, S., Yoo, S. H., Huang, H. C., ... Takahashi, J. S.  
676 (2013). C57BL/6N mutation in Cytoplasmic FMRP interacting protein 2 regulates cocaine  
677 response. *Science (New York, N. Y.)*, *342*(6165), 1508–1512.  
678 <https://doi.org/10.1126/science.1245503>;
- 679 Ludwin, S. K. (1978). Central nervous system demyelination and remyelination in the mouse: an  
680 ultrastructural study of cuprizone toxicity. *Laboratory Investigation; a Journal of*  
681 *Technical Methods and Pathology*, *39*(6), 597–612.
- 682 Ludwin, S. K., & Sternberger, N. H. (1984). An immunohistochemical study of myelin proteins  
683 during remyelination in the central nervous system. *Acta Neuropathologica*, *63*(3), 240–  
684 248. <https://doi.org/10.1007/bf00685250>
- 685 Mandolesi, G., Bullitta, S., Fresegna, D., De Vito, F., Rizzo, F. R., Musella, A., ... Gentile, A.  
686 (2019). Voluntary running wheel attenuates motor deterioration and brain damage in  
687 cuprizone-induced demyelination. *Neurobiology of Disease*, *129*, 102–117.  
688 <https://doi.org/10.1016/j.nbd.2019.05.010>
- 689 Mayne, M., Moffatt, T., Kong, H., McLaren, P. J., Fowke, K. R., Becker, K. G., ... Melanson, M.  
690 (2004). CYFIP2 is highly abundant in CD4+ cells from multiple sclerosis patients and is

- 691 involved in T cell adhesion. *European Journal of Immunology*, 34(4), 1217–1227.  
692 <https://doi.org/10.1002/eji.200324726>
- 693 Mettler, L. N., Shott, M. E., Pryor, T., Yang, T. T., & Frank, G. K. (2013). White matter integrity is  
694 reduced in bulimia nervosa. *The International Journal of Eating Disorders*, 46(3), 264–  
695 273. <https://doi.org/10.1002/eat.22083>
- 696 Mueller, K., Anwander, A., Möller, H. E., Horstmann, A., Lepsien, J., Busse, F., ... Pleger, B.  
697 (2011). Sex-dependent influences of obesity on cerebral white matter investigated by  
698 diffusion-tensor imaging. *PloS One*, 6(4), e18544.  
699 <https://doi.org/10.1371/journal.pone.0018544>
- 700 Naruo, T., Nakabeppu, Y., Deguchi, D., Nagai, N., Tsutsui, J., Nakajo, M., & Nozoe, S. (2001).  
701 Decreases in blood perfusion of the anterior cingulate gyri in Anorexia Nervosa  
702 Restricters assessed by SPECT image analysis. *BMC Psychiatry*, 1, 2.
- 703 Pankevich, D. E., Teegarden, S. L., Hedin, A. D., Jensen, C. L., & Bale, T. L. (2010). Caloric  
704 restriction experience reprograms stress and orexigenic pathways and promotes binge  
705 eating. *The Journal of Neuroscience : The Official Journal of the Society for*  
706 *Neuroscience*, 30(48), 16399–16407. [https://doi.org/10.1523/JNEUROSCI.1955-](https://doi.org/10.1523/JNEUROSCI.1955-10.2010)  
707 [10.2010](https://doi.org/10.1523/JNEUROSCI.1955-10.2010);
- 708 Polivy, J., Zeitlin, S. B., Herman, C. P., & Beal, A. L. (1994). Food restriction and binge eating: a  
709 study of former prisoners of war. *Journal of Abnormal Psychology*, 103(2), 409–411.  
710 <https://doi.org/10.1037//0021-843x.103.2.409>
- 711 Prohaska, J. R. (1983). Changes in tissue growth, concentrations of copper, iron, cytochrome  
712 oxidase and superoxide dismutase subsequent to dietary or genetic copper deficiency in  
713 mice. *The Journal of Nutrition*, 113(10), 2048–2058.  
714 <https://doi.org/10.1093/jn/113.10.2048>

- 715 Sen, M. K., Mahns, D. A., Coorsen, J. R., & Shortland, P. J. (2019). Behavioural phenotypes in  
716 the cuprizone model of central nervous system demyelination. *Neuroscience and*  
717 *Biobehavioral Reviews*, *107*, 23–46. <https://doi.org/10.1016/j.neubiorev.2019.08.008>
- 718 Silva, A. I., Haddon, J. E., Ahmed Syed, Y., Trent, S., Lin, T.-C. E., Patel, Y., ... Wilkinson, L. S.  
719 (2019). Cyfip1 haploinsufficient rats show white matter changes, myelin thinning,  
720 abnormal oligodendrocytes and behavioural inflexibility. *Nature Communications*, *10*(1),  
721 3455. <https://doi.org/10.1038/s41467-019-11119-7>
- 722 Skripuletz, T., Gudi, V., Hackstette, D., & Stangel, M. (2011). De- and remyelination in the CNS  
723 white and grey matter induced by cuprizone: the old, the new, and the unexpected.  
724 *Histology and Histopathology*, *26*(12), 1585–1597. <https://doi.org/10.14670/HH-26.1585>
- 725 Steelman, A. J., Thompson, J. P., & Li, J. (2012). Demyelination and remyelination in  
726 anatomically distinct regions of the corpus callosum following cuprizone intoxication.  
727 *Neuroscience Research*, *72*(1), 32–42. <https://doi.org/10.1016/j.neures.2011.10.002>
- 728 Stidworthy, M. F., Genoud, S., Suter, U., Mantei, N., & Franklin, R. J. M. (2003). Quantifying the  
729 early stages of remyelination following cuprizone-induced demyelination. *Brain*  
730 *Pathology (Zurich, Switzerland)*, *13*(3), 329–339.
- 731 Tauscher, J., Pirker, W., Willeit, M., de Zwaan, M., Bailer, U., Neumeister, A., ... Kasper, S.  
732 (2001). [123I] beta-CIT and single photon emission computed tomography reveal  
733 reduced brain serotonin transporter availability in bulimia nervosa. *Biological Psychiatry*,  
734 *49*(4), 326–332. [https://doi.org/10.1016/s0006-3223\(00\)00951-3](https://doi.org/10.1016/s0006-3223(00)00951-3)
- 735 Taylor, C. G., Bettger, W. J., & Bray, T. M. (1988). Effect of dietary zinc or copper deficiency on  
736 the primary free radical defense system in rats. *The Journal of Nutrition*, *118*(5), 613–  
737 621. <https://doi.org/10.1093/jn/118.5.613>
- 738 Taylor, L. C., Gilmore, W., & Matsushima, G. K. (2009). SJL mice exposed to cuprizone  
739 intoxication reveal strain and gender pattern differences in demyelination. *Brain*

740 *Pathology (Zurich, Switzerland)*, 19(3), 467–479. <https://doi.org/10.1111/j.1750->  
741 3639.2008.00230.x

742 Taylor, L. C., Gilmore, W., Ting, J. P.-Y., & Matsushima, G. K. (2010). Cuprizone induces similar  
743 demyelination in male and female C57BL/6 mice and results in disruption of the estrous  
744 cycle. *Journal of Neuroscience Research*, 88(2), 391–402.  
745 <https://doi.org/10.1002/jnr.22215>

746 Valenstein, E. S., Cox, V. C., & Kakolewski, J. W. (1969). Sex differences in hyperphagia and  
747 body weight following hypothalamic damage. *Annals of the New York Academy of*  
748 *Sciences*, 157(2), 1030–1048. <https://doi.org/10.1111/j.1749-6632.1969.tb12935.x>

749 Via, E., Zalesky, A., Sanchez, I., Forcano, L., Harrison, B. J., Pujol, J., ... Fornito, A. (2014).  
750 Disruption of brain white matter microstructure in women with anorexia nervosa. *Journal*  
751 *of Psychiatry & Neuroscience : JPN*, 39(6), 367–375. <https://doi.org/10.1503/jpn.130135>

752 Yau, W. Y., Bischoff-Grethe, A., Theilmann, R. J., Torres, L., Wagner, A., Kaye, W. H., &  
753 Fennema-Notestine, C. (2013). Alterations in white matter microstructure in women  
754 recovered from anorexia nervosa. *The International Journal of Eating Disorders*, 46(7),  
755 701–708. <https://doi.org/10.1002/eat.22154>

756 Yazdani, N., Parker, C. C., Shen, Y., Reed, E. R., Guido, M. A., Kole, L. A., ... Bryant, C. D.  
757 (2015). Hnrnp1 Is A Quantitative Trait Gene for Methamphetamine Sensitivity. *PLoS*  
758 *Genetics*, 11(12), e1005713. <https://doi.org/10.1371/journal.pgen.1005713>

759 Zorrilla, E. P., Sanchez-Alavez, M., Sugama, S., Brennan, M., Fernandez, R., Bartfai, T., &  
760 Conti, B. (2007). Interleukin-18 controls energy homeostasis by suppressing appetite  
761 and feed efficiency. *Proceedings of the National Academy of Sciences of the United*  
762 *States of America*, 104(26), 11097–11102. <https://doi.org/10.1073/pnas.0611523104>  
763
